# Supplementary material for: A study of the structure–activity relationship of the electrochemical performance and Li/Ni mixing of lithium-rich materials by neutron diffraction
Source: Royal Society of Chemistry journal article supplement (doi:10.1039/c5ra02380g), 2015-01-01
Supplement: c5ra02380g1.pdf [file c5ra02380g1.pdf]

## Supporting information

### The studying of the structure-activity relationship of electrochemical performance and Li/Ni mixing of lithium-rich materials by neutron diffraction

Enyue Zhao<sup>a</sup>, Zhongbo Hu<sup>a</sup>, Lei Xie<sup>b</sup>, Xiping Chen<sup>b</sup>, Xiaoling Xiao<sup>\*a</sup> and Xiangfeng Liu<sup>\*a</sup>

<sup>a</sup> College of Materials Science and Opto-electronic Technology University of Chinese Academy of Sciences, Beijing 100049, P. R. China

<sup>b</sup> Institute of Nuclear Physics and Chemistry, China Academy of Engineering Physics, Mianyang 621999, China

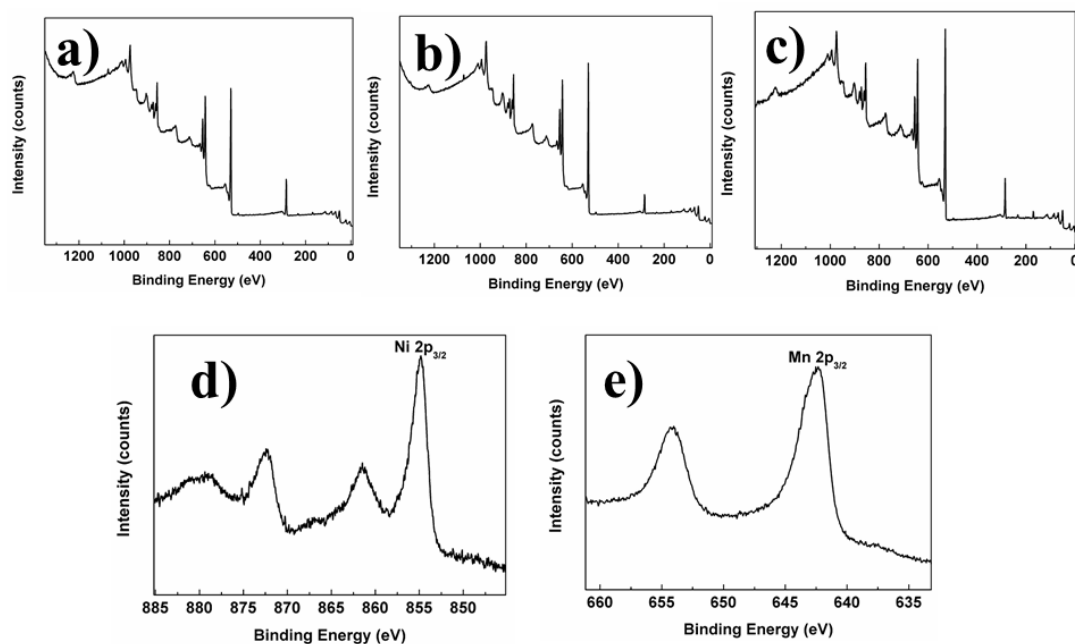

Figure SI 1. X-ray photoelectron spectroscopy (XPS) spectra of: a, d, e) pristine sample, b) 4mol% Mg-doped sample and c) 1mol% Al-doped sample.

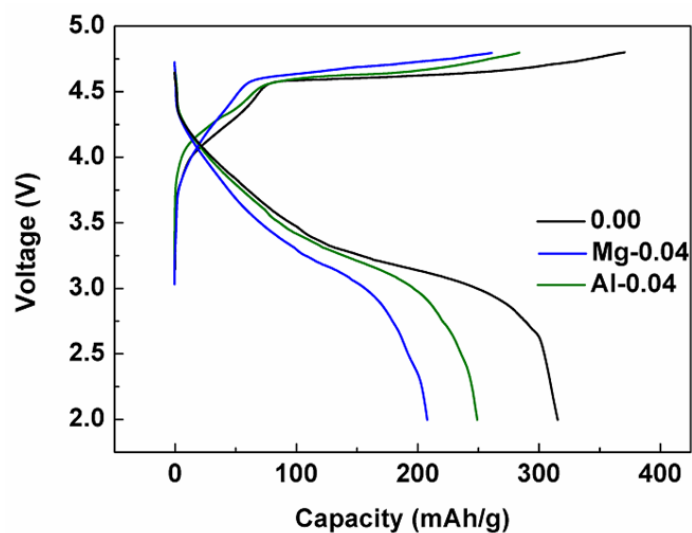

Figure SI 2. The first charge-discharge curves of the pristine, 4mol% Mg-doped and 1mol% Al-doped electrodes.

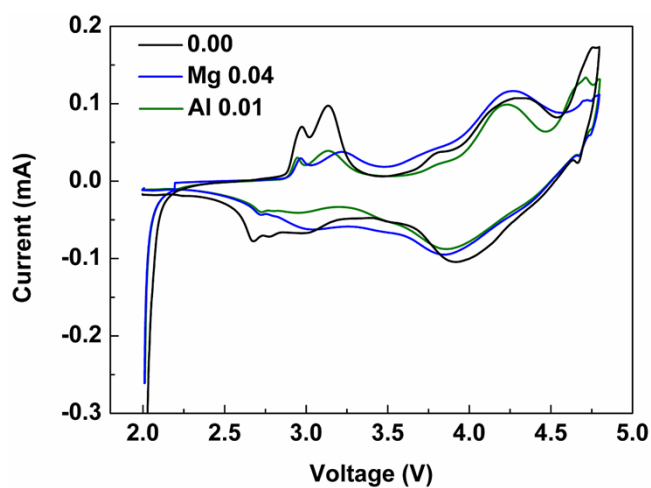

Figure SI 3. CV of the pristine, 4mol% Mg-doped and 1mol% Al-doped cathode materials in the voltage range between 2.0 and 4.8V, scan rate-0.1mV/s.

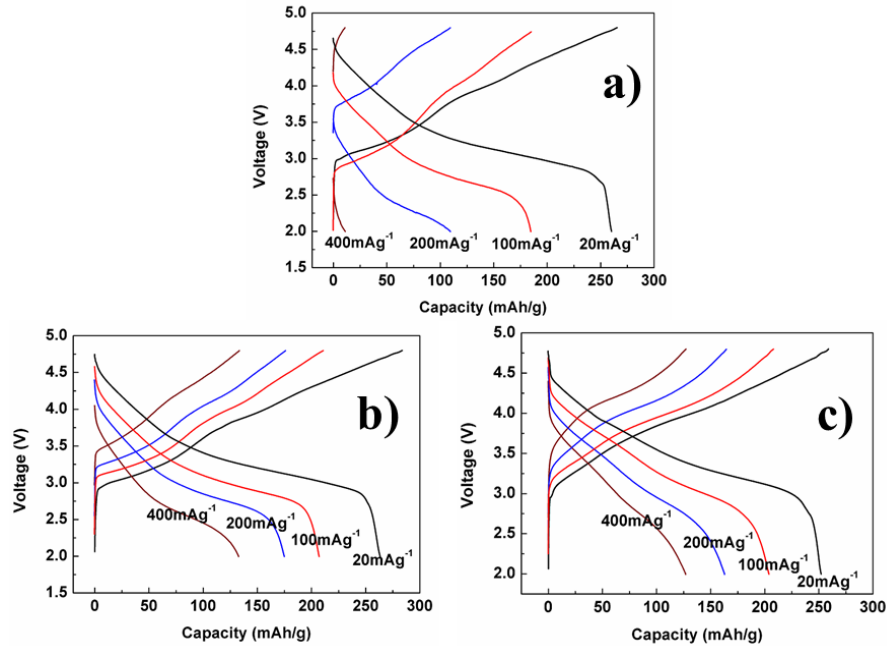

Figure SI 4. The charge-discharge curves of lithium-rich layered oxide materials at various rates between 2.0 and 4.8V: a) pristine electrode, b) 4mol% Mg-doped electrode and c) 1mol% Al-doped electrode.

Table SI 1. Discharge capacity of the pristine, 4mol% Mg-doped and 1mol% Al-doped samples at the current density of 100mA $g^{-1}$ .

| Cycle                         | 3 <sup>rd</sup> | 20 <sup>th</sup> | 50 <sup>th</sup> | 80 <sup>th</sup> | Capacity retention (%) |
|-------------------------------|-----------------|------------------|------------------|------------------|------------------------|
| Pristine (mAh $g^{-1}$ )      | 136             | 141              | 138              | 140              | 103                    |
| 4mol% Mg-doped(mAh $g^{-1}$ ) | 184             | 183              | 193              | 188              | 102                    |
| 1mol% Al-doped(mAh $g^{-1}$ ) | 180             | 179              | 174              | 170              | 94                     |

Table SI 2. The discharge capacity of the pristine, 4mol% Mg-doped and 1mol% Al-doped samples at different charge-discharge current density.

---

| Rate                           | 20mA $g^{-1}$ | 100mA $g^{-1}$ | 200mA $g^{-1}$ | 400mA $g^{-1}$ |
|--------------------------------|---------------|----------------|----------------|----------------|
| Pristine (mA $h g^{-1}$ )      | 261           | 140            | 110            | 10             |
| 4mol% Mg-doped(mA $h g^{-1}$ ) | 252           | 188            | 175            | 135            |
| 1mol% Al-doped(mA $h g^{-1}$ ) | 242           | 170            | 165            | 127            |

---
